# Supplementary material
Source: Springer Nature journal article supplement (https://www.springermedizin.de/resource/supplementary/12963_2012_212_MOESM1_ESM.pdf/9572402)
Supplement: MOESM1 [file 9572402]

**Table A.1: Multivariate regression of log biomarker levels on selected socioeconomic indicators (both sexes combined)**

|                                                                    | <b>Cholesterol</b>                    | <b>HDL</b>                            | <b>Chol/HDL Ratio</b>              | <b>LDL</b>                            | <b>Creatinine</b>                      | <b>CRP</b>             | <b>Albumin</b>                        |
|--------------------------------------------------------------------|---------------------------------------|---------------------------------------|------------------------------------|---------------------------------------|----------------------------------------|------------------------|---------------------------------------|
| <b>Model 1: Schooling</b>                                          |                                       |                                       |                                    |                                       |                                        |                        |                                       |
| No Schooling                                                       | ref.                                  | ref.                                  | ref.                               | ref.                                  | ref.                                   | ref.                   | ref.                                  |
| Primary Schooling                                                  | 0.035 <sup>+</sup><br>[-0.0064,0.077] | 0.029<br>[-0.033,0.092]               | 0.0060<br>[-0.044,0.056]           | 0.052<br>[-0.014,0.12]                | 0.0025<br>[-0.033,0.039]               | 0.18<br>[-0.12,0.48]   | 0.0085<br>[-0.013,0.030]              |
| Secondary Schooling                                                | 0.079<br>[-0.022,0.18]                | 0.061<br>[-0.090,0.21]                | 0.017<br>[-0.10,0.14]              | 0.069<br>[-0.090,0.23]                | 0.068<br>[-0.019,0.16]                 | -0.013<br>[-0.75,0.72] | 0.017<br>[-0.035,0.069]               |
| <b>Model 2: Marital status</b>                                     |                                       |                                       |                                    |                                       |                                        |                        |                                       |
| Married (in 2008)                                                  | 0.025<br>[-0.025,0.075]               | 0.038<br>[-0.037,0.11]                | -0.013<br>[-0.073,0.047]           | 0.026<br>[-0.052,0.10]                | 0.0056<br>[-0.037,0.048]               | -0.28<br>[-0.64,0.084] | 0.0054<br>[-0.020,0.031]              |
| <b>Model 3: Religion (major groups)</b>                            |                                       |                                       |                                    |                                       |                                        |                        |                                       |
| Christian/Other/None                                               | ref.                                  | ref.                                  | ref.                               | ref.                                  | ref.                                   | ref.                   | ref.                                  |
| Muslim                                                             | 0.028<br>[-0.011,0.067]               | 0.015<br>[-0.045,0.075]               | 0.013<br>[-0.034,0.061]            | 0.027<br>[-0.035,0.090]               | -0.015<br>[-0.049,0.019]               | -0.21<br>[-0.49,0.079] | 0.018 <sup>+</sup><br>[-0.0020,0.039] |
| <b>Model 4: Wealth (based on asset-based wealth tertiles)</b>      |                                       |                                       |                                    |                                       |                                        |                        |                                       |
| 1st (poorest)                                                      | 0.0086<br>[-0.036,0.053]              | 0.042<br>[-0.025,0.11]                | -0.033<br>[-0.086,0.020]           | 0.0092<br>[-0.061,0.080]              | 0.037 <sup>+</sup><br>[-0.0020,0.075]  | -0.093<br>[-0.42,0.23] | -0.012<br>[-0.035,0.011]              |
| 2nd (middle)                                                       | ref.                                  | ref.                                  | ref.                               | ref.                                  | ref.                                   | ref.                   | ref.                                  |
| 3th (wealthiest)                                                   | 0.013<br>[-0.031,0.058]               | -0.0058<br>[-0.073,0.061]             | 0.019<br>[-0.034,0.072]            | 0.035<br>[-0.036,0.11]                | 0.027<br>[-0.012,0.066]                | -0.14<br>[-0.46,0.19]  | 0.0091<br>[-0.014,0.032]              |
| <b>Model 5: Body Mass Index (BMI) (reference category: normal)</b> |                                       |                                       |                                    |                                       |                                        |                        |                                       |
| Underweight                                                        | -0.048<br>[-0.11,0.012]               | -0.00073<br>[-0.092,0.090]            | -0.047<br>[-0.12,0.025]            | -0.092 <sup>+</sup><br>[-0.19,0.0027] | -0.075 <sup>**</sup><br>[-0.13,-0.023] | -0.056<br>[-0.49,0.38] | -0.015<br>[-0.046,0.017]              |
| Normal                                                             | ref.                                  | ref.                                  | ref.                               | ref.                                  | ref.                                   | ref.                   | ref.                                  |
| Overwght/Obese                                                     | 0.077*<br>[0.0034,0.15]               | -0.056<br>[-0.17,0.054]               | 0.13 <sup>**</sup><br>[0.046,0.22] | 0.15 <sup>**</sup><br>[0.038,0.27]    | 0.056 <sup>+</sup><br>[-0.0076,0.12]   | 0.71*<br>[0.16,1.26]   | 0.0093<br>[-0.029,0.048]              |
| BMI missing                                                        | -0.017<br>[-0.059,0.024]              | -0.057 <sup>+</sup><br>[-0.12,0.0052] | 0.040<br>[-0.0094,0.090]           | -0.0071<br>[-0.073,0.058]             | -0.021<br>[-0.057,0.014]               | 0.013<br>[-0.29,0.31]  | 0.0020<br>[-0.020,0.024]              |

Log values of the biomarkers are used as dependent variable to reduce skewness of the distributions; for 48 cases where the CRP variable equals zero because CRP was below detectable levels, log(.01) is used as the value of the dependent variable.

*p*-values: <sup>+</sup> *p* < 0.10, \* *p* < 0.05, \*\* *p* < 0.01. 95% Confidence intervals in parentheses.

Models control for gender, age group (separate for males/females), and currently pregnant (females only).
